# Supplementary material for: Control of cationic epoxy polymerization by supramolecular initiation
Source: Royal Society of Chemistry journal article supplement (doi:10.1039/c2py21140h), 2013-01-01
Supplement: c2py21140h.pdf [file c2py21140h.pdf]

# Supporting information for

## Control of cationic epoxy polymerization by supramolecular initiation

Thomas Vidil, François Tournilhac\*, Ludwik Leibler

|                                                                                                                                                                                              |      |
|----------------------------------------------------------------------------------------------------------------------------------------------------------------------------------------------|------|
| I. <b>Materials.</b>                                                                                                                                                                         | S-2  |
| II. <b>Synthesis</b> of initiators <b>BF<sub>3</sub>•4CA</b> , <b>BF<sub>4</sub><sup>-</sup>•4CA<sup>+</sup></b> and <b>BF<sub>4</sub><sup>-</sup>•4CA<sup>+</sup>•18-crown-6</b> .          | S-3  |
| III. <b><sup>1</sup>H NMR</b> of initiators <b>BF<sub>3</sub>•4CA</b> , <b>BF<sub>4</sub><sup>-</sup>•4CA<sup>+</sup></b> and <b>BF<sub>4</sub><sup>-</sup>•4CA<sup>+</sup>•18-crown-6</b> . | S-5  |
| IV. <b>General procedure for sample preparation</b> before IR, Rheology and DSC tests.                                                                                                       | S-8  |
| V. <b>IR monitoring</b> of the curing: procedure, spectra and conversion data.                                                                                                               | S-9  |
| VI. <b>Rheology monitoring</b> of the curing: procedure and G'/G'' data.                                                                                                                     | S-12 |
| VII. <b>Dynamic scanning Calorimetry (DSC)</b> monitoring of the curing reaction                                                                                                             | S-16 |
| VIII. <b>DSC of materials:</b> glass temperatures T <sub>g</sub> .                                                                                                                           | S-18 |
| IX. <b>References.</b>                                                                                                                                                                       | S-19 |

## I. Materials

The epoxy resin used is the diglycidylether of bisphenol A (DGEBA), supplied from Dow Chemical. 18-crown-6, boron trifluoride etherate, 4-chloroaniline were supplied from Acros. Tetrafluoroboric acid was supplied from Alfa Aesar. All reagents were used as received.

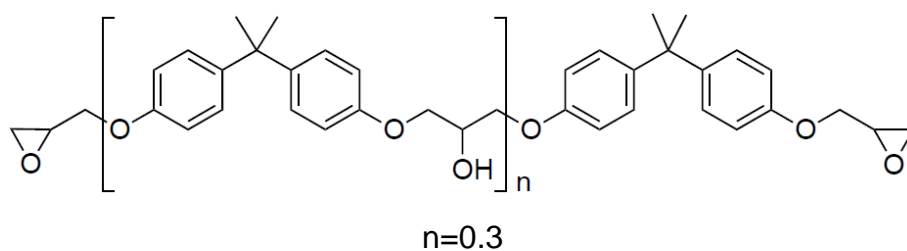

Figure S1 – Molecular formula of the epoxy resin used in the study, DGEBA DER 332

## II. Synthesis of initiators $\text{BF}_3 \cdot 4\text{CA}$ , $\text{BF}_4^- \cdot 4\text{CA}^+$ , $\text{BF}_4^- \cdot 4\text{CA}^+ \cdot 18\text{-crown-6}$

### Complex of 4-chloroaniline and boron trifluoride<sup>i</sup>, $\text{BF}_3 \cdot 4\text{CA}$

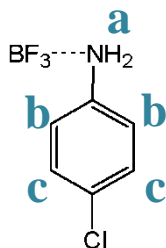

To a solution of 4-chloroaniline (10 g, 78.4 mmol, 1 eq.) in dichloromethane (70 mL) cooled to 0°C, was added  $\text{BF}_3 \cdot (\text{C}_2\text{H}_5)_2\text{O}$  (solution 48%  $\text{BF}_3$  in  $\text{Et}_2\text{O}$ , 9.9 mL, 11.1 g, 78.4 mmol of  $\text{BF}_3$ , 1 éq.) under nitrogen atmosphere and allowed to stir for 3h at room temperature. The resulted beige precipitate was filtered, washed with dichloromethane and dried under vacuum for 5h at 35°C. Yield : 15g, 76.8 mmol, 98%.  $^1\text{H}$  NMR (DMSO- $d_6$ , in ppm from tetramethylsilane) : 6,10 (s, 2H, Ha), 6.66 (dt, 2H, Hb), 7.09 (dt, 2H, Hc).

Elem. Anal. Calcd for  $\text{C}_6\text{H}_6\text{BF}_3\text{NCl}$ : C, 36,88; H, 3,09; N, 7,17; F,15,84. Found: C, 35,82; H, 2,92; N, 6,79.

### 4-chloro-anilinium tetrafluoroborate salt, $\text{BF}_4^- \cdot 4\text{CA}^+$

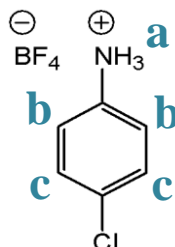

To a solution of 4-chloroaniline (4 g, 23.4 mmol, 1 eq.) in MeOH (10 mL), was added  $\text{HBF}_4$  (solution 50wt%  $\text{HBF}_4$  in  $\text{H}_2\text{O}$ , 3.8 mL, 4,1 g, 23.1 mmol of  $\text{HBF}_4$ , 0.98 éq.) allowed to stir for 30min at room temperature. The solvent was removed under vacuum and the resulted beige solid was recrystallized from  $\text{CH}_3\text{CN}$  (6mL, 70°C). The resulted white precipitate was filtered, washed with dichloromethane and dried under vacuum for 15h at 80°C. Yield : 4g, 18.6 mmol, 79%.  $^1\text{H}$  NMR (DMSO- $d_6$ , in ppm from tetramethylsilane) : 7.27 ( dt, 2H, Hb), 7.51 (dt, 2H, Hc). 9.20 (s, 3H, Ha).

Elem. Anal. Calcd for  $\text{C}_6\text{H}_7\text{BF}_4\text{NCl}$  : C, 33,45; H, 3,28; N, 6,50; F,35,28. Found: C, 33,26; H, 3,34; N, 6,67; F, 35,26.

#### 4-chloro-anilinium tetrafluoroborate 18-crown-6, $\text{BF}_4^- \cdot 4\text{CA}^+ \cdot 18\text{-crown-6}$

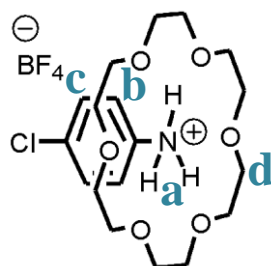

To a solution of 4-chloroaniline (1.5 g, 11.7 mmol, 1 eq.) in MeOH (5 mL), was added  $\text{HBF}_4$  (solution 50wt%  $\text{HBF}_4$  in  $\text{H}_2\text{O}$ , 1.76 mL, 2.48 g, 14.1 mmol of  $\text{HBF}_4$ , 1.2 éq.) allowed to stir for 50min at room temperature. 18-crown-6 was dissolved in MeOH (2mL) and the mixture was added to the previous solution. The resulted mixture was allowed to stir for 30min at room temperature. The white precipitate was filtered and recrystallized from MeOH (50mL, 65°C). The resulted white precipitate was filtered, washed with MeOH and dried under vacuum for 20h at 45°C. Yield : 4.4g, 9.2 mmol, 75%.  $^1\text{H}$  NMR (DMSO- $d_6$ , in ppm from tetramethylsilane): 3.53 (s, 24H, Hd), 7.27 ( dt, 2H, Hb), 7.51 (dt, 2H, Hc), 8.91 (s, 3H, Ha). Elem. Anal. Calcd for  $\text{C}_{18}\text{H}_{31}\text{BF}_4\text{NO}_6\text{Cl}$  : C, 45,07; H, 6,51; N, 2,91; F,15,84. Found: C, 45,22; H, 6,75; N, 3,01; F, 15,68.

#### General remarks on initiators solubility

**$\text{BF}_3 \cdot 4\text{CA}$ :** excellent solubility in Acetone, MeOH and DMSO. Good solubility in resin after solubilisation in Acetone. Poor solubility in  $\text{CH}_2\text{Cl}_2$  and  $\text{CHCl}_3$ .

**$\text{BF}_4^- \cdot 4\text{CA}^+$ :** excellent solubility in Acetone, MeOH and DMSO. Good solubility in resin after solubilisation in Acetone. Poor solubility in  $\text{CH}_2\text{Cl}_2$  and  $\text{CHCl}_3$ .

**$\text{BF}_4^- \cdot 4\text{CA}^+ \cdot 18\text{-crown-6}$ :** Good solubility in  $\text{CH}_2\text{Cl}_2$ ,  $\text{CHCl}_3$ , and DMSO. Good solubility in resin after solubilisation in  $\text{CH}_2\text{Cl}_2$ . Poor solubility in MeOH and Acetone.

### III. $^1\text{H}$ NMR of initiators $\text{BF}_3\cdot\text{4CA}$ , $\text{BF}_4^-\cdot\text{4CA}^+$ , $\text{BF}_4^-\cdot\text{4CA}^+\cdot\text{18-crown-6}$

NMR spectra were performed on a Bruker (400MHz) instrument.  $\text{BF}_3\cdot\text{4CA}$ ,  $\text{BF}_4^-\cdot\text{4CA}^+$  and  $\text{BF}_4^-\cdot\text{4CA}^+\cdot\text{18-crown-6}$  spectrum were all performed in deuterated dimethylsulfoxide (DMSO- $\text{d}_6$ ) at 1wt%.

Notation for peaks shape: s (singlet), dt (doublet of triplet).

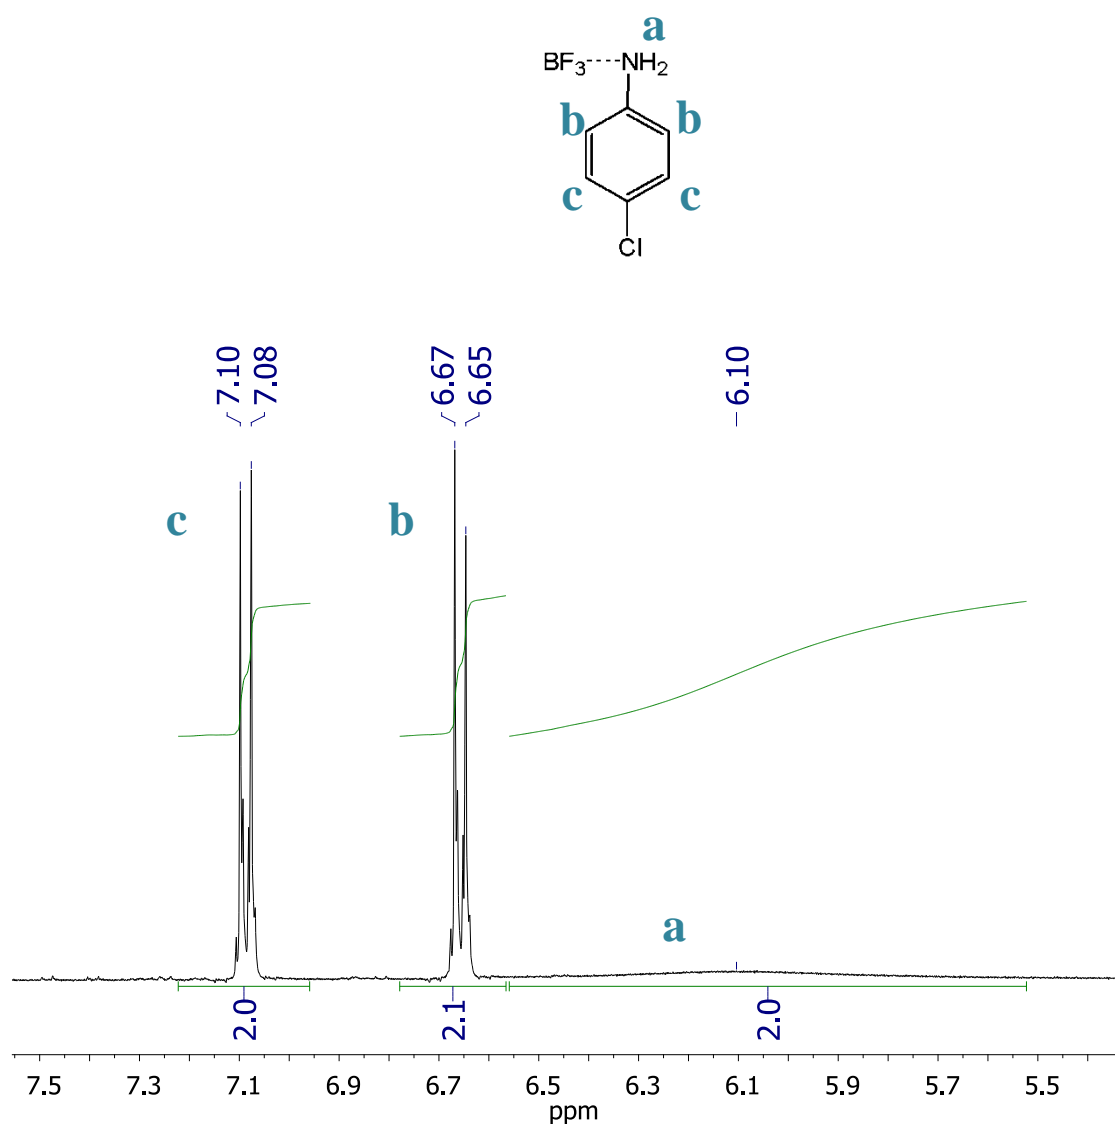

Figure S2 -  $^1\text{H}$  NMR spectrum in DMSO- $\text{d}_6$  of  $\text{BF}_3\cdot\text{4CA}$ .

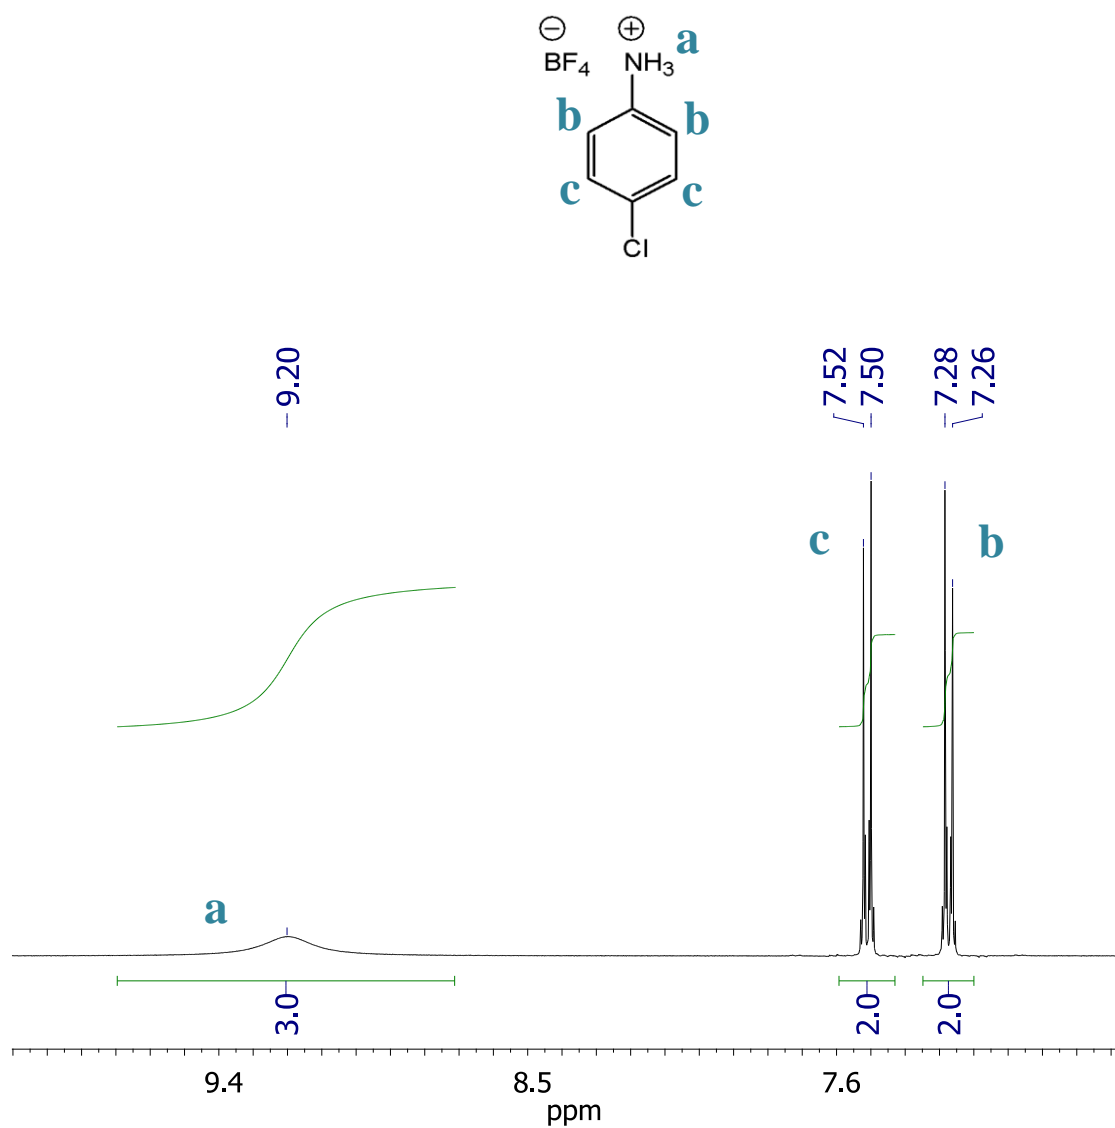

Figure S3 -  $^1\text{H}$  NMR spectrum in  $\text{DMSO-d}_6$  of  $\text{BF}_4^- \cdot 4\text{CA}^+$ .

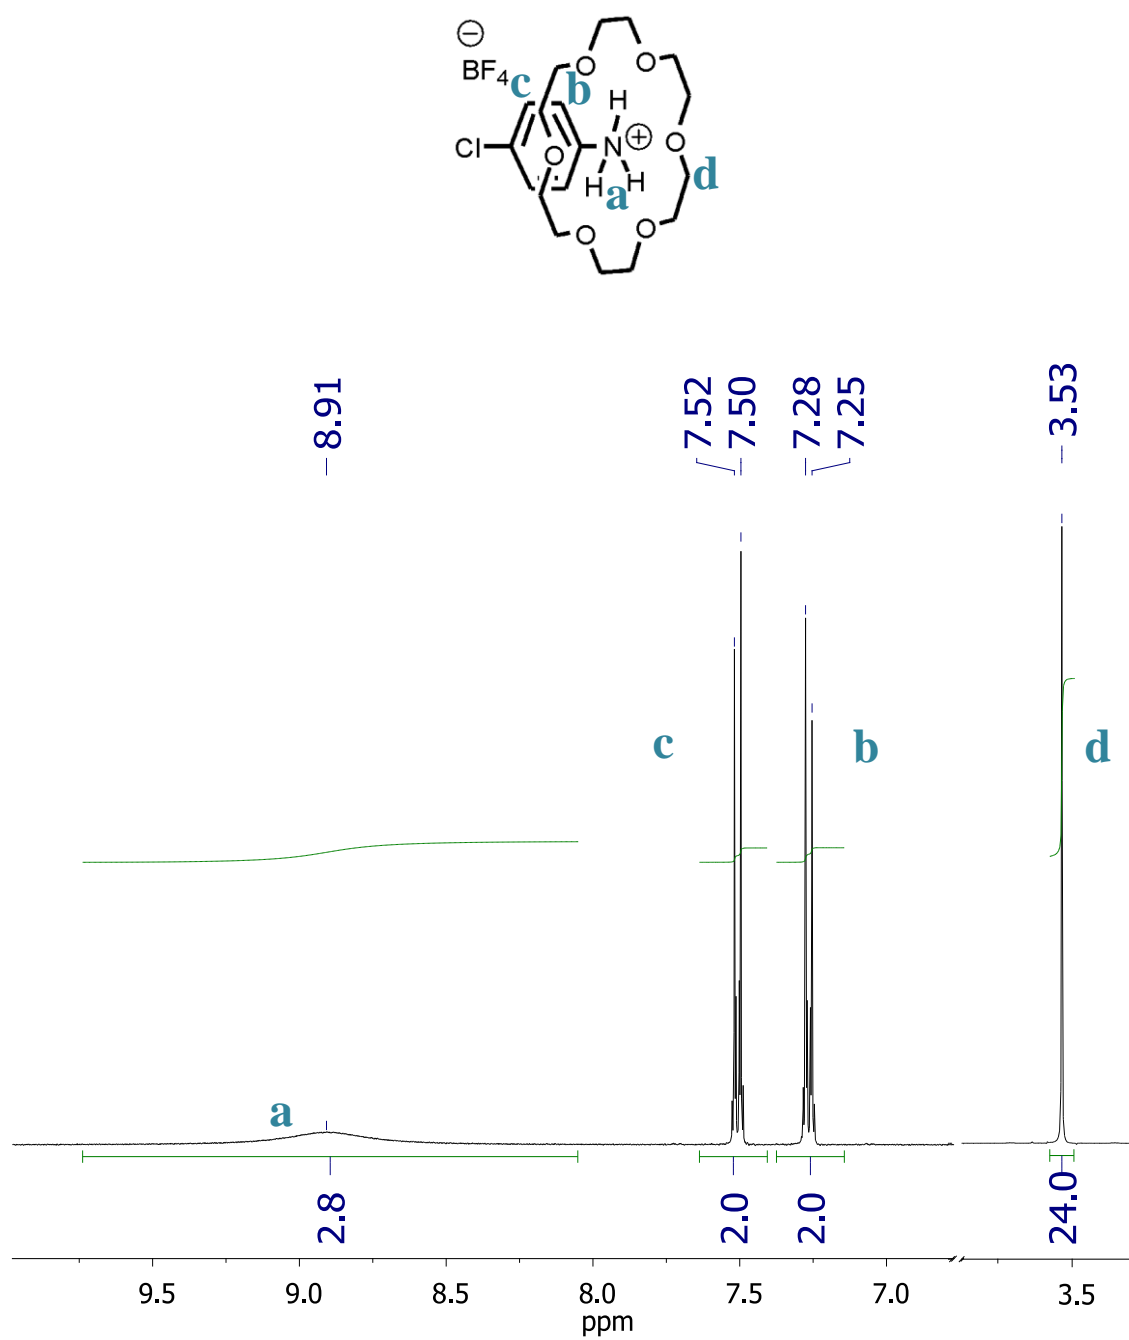

Figure S4 -  $^1\text{H}$  NMR spectrum in  $\text{DMSO-d}_6$  of  $\text{BF}_4^- \cdot 4\text{CA}^+ \cdot 18\text{-crown-6}$ .

#### IV. General procedure for sample preparation before IR, Rheology and DSC tests.

The reactive mixtures were obtained by melting the epoxy resins DGEBA (2g) at 70°C to give a viscous liquid then cooled at room temperature. The initiator was predissolved in a solvent using acetone (~0.4mL) for **BF<sub>3</sub>•4CA** (59mg, 0,026eq./epoxy) and **BF<sub>4</sub><sup>-</sup>•4CA<sup>+</sup>** (66mg, 0,026eq./epoxy), and using dichloromethane (~0.4mL) for **BF<sub>4</sub><sup>-</sup>•4CA<sup>+</sup>•18-crown-6** (146mg, 0,026eq./epoxy). The solution was then added to the resin. The resulting mixture was vigorously stirred to give a homogeneous and colourless sample placed under vacuum during several minutes to evaporate the solvent used to dissolve the initiator. Blends obtained were then studied through spectroscopic, rheological and Dynamic Scanning Calorimetry experiments.



## V. IR monitoring of the curing: procedure, spectra and conversion data.

The isothermal curing process was monitored using a Bruker-Tensor 37 with a resolution of  $4\text{cm}^{-1}$ , equipped with a thermally controlled SPECAC Goldengate ATR accessory. The disappearance of the  $914\text{cm}^{-1}$  absorbance peak (epoxy bending) was monitored to determine the epoxy conversion. The peak at  $1605\text{ cm}^{-1}$  (phenyl group) was chosen as an internal standard<sup>ii,iii,iv</sup>. Conversion was determined by the Lambert-Beer law from the normalized change of absorbance at  $914\text{cm}^{-1}$ :

$$\alpha_{\text{epoxy}} = 1 - \left( \frac{\bar{A}_{914}^t}{\bar{A}_{914}^0} \right)$$

where  $\bar{A}_{914}^0 = A_{914}^0 / A_{1605}^0$  et  $\bar{A}_{914}^t = A_{914}^t / A_{1605}^t$  are the normalized absorbance of the epoxy groups before curing and after reaction time  $t$ , respectively.

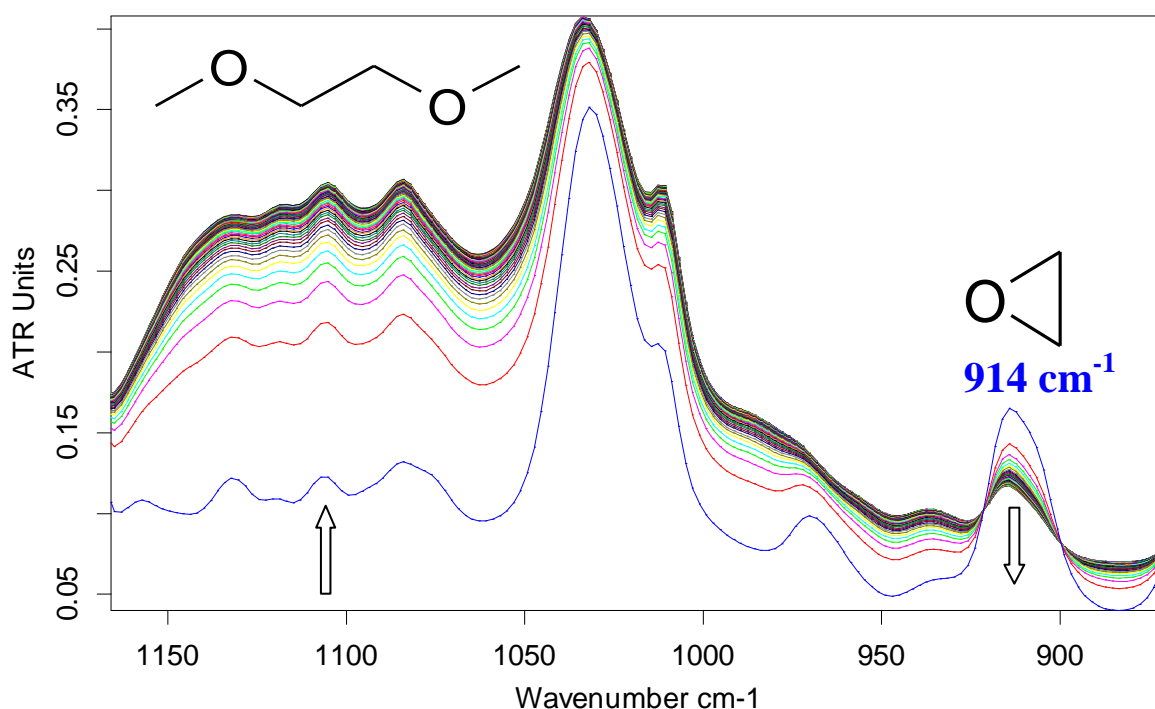

Figure S5 – FTIR spectra of the DGEBA/ $\text{BF}_4^-$ - $4\text{CA}^+$  0.026eq./epoxy system at  $60^\circ\text{C}$  at different curing periods with the decrease of the absorption of the epoxide group at  $914\text{cm}^{-1}$  and the increase of the 1,2-polyether absorption peaks between  $1050$  and  $1150\text{ cm}^{-1}$ .

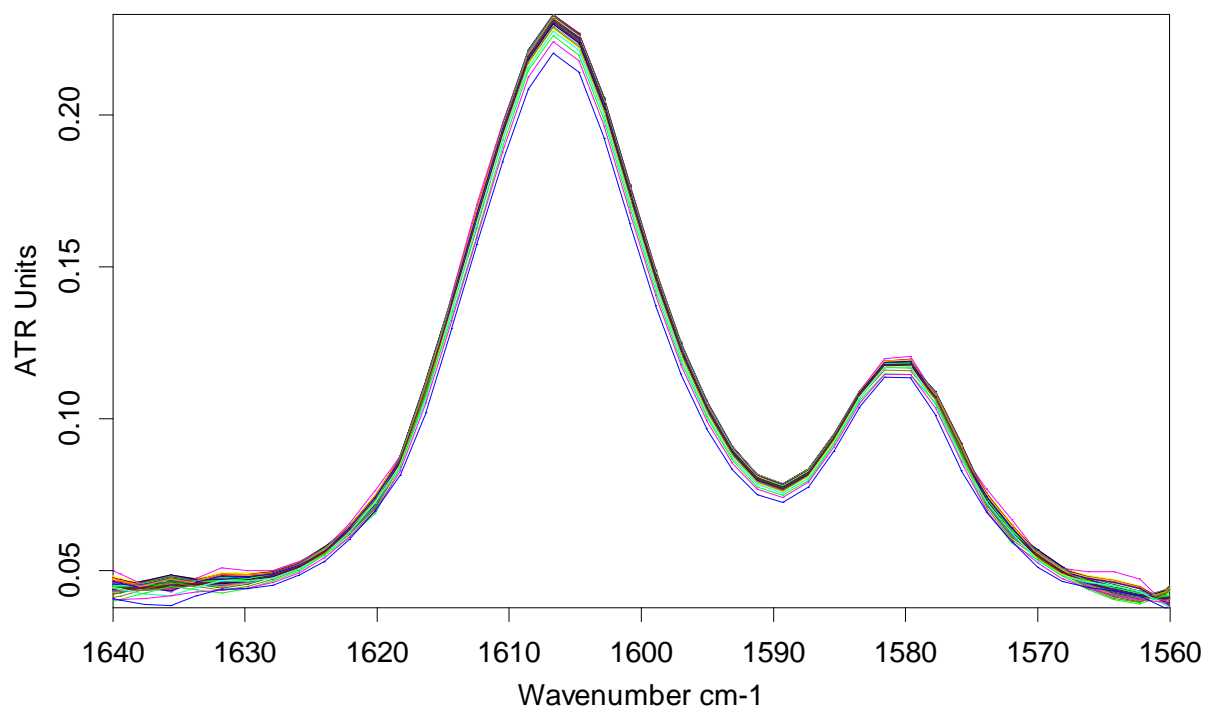

Figure S6 - FTIR spectra of the DGEBA/ $\text{BF}_4^- \cdot 4\text{CA}^+$  system at  $60^\circ\text{C}$  at different curing periods:  
reference peak at  $1605\text{cm}^{-1}$ .

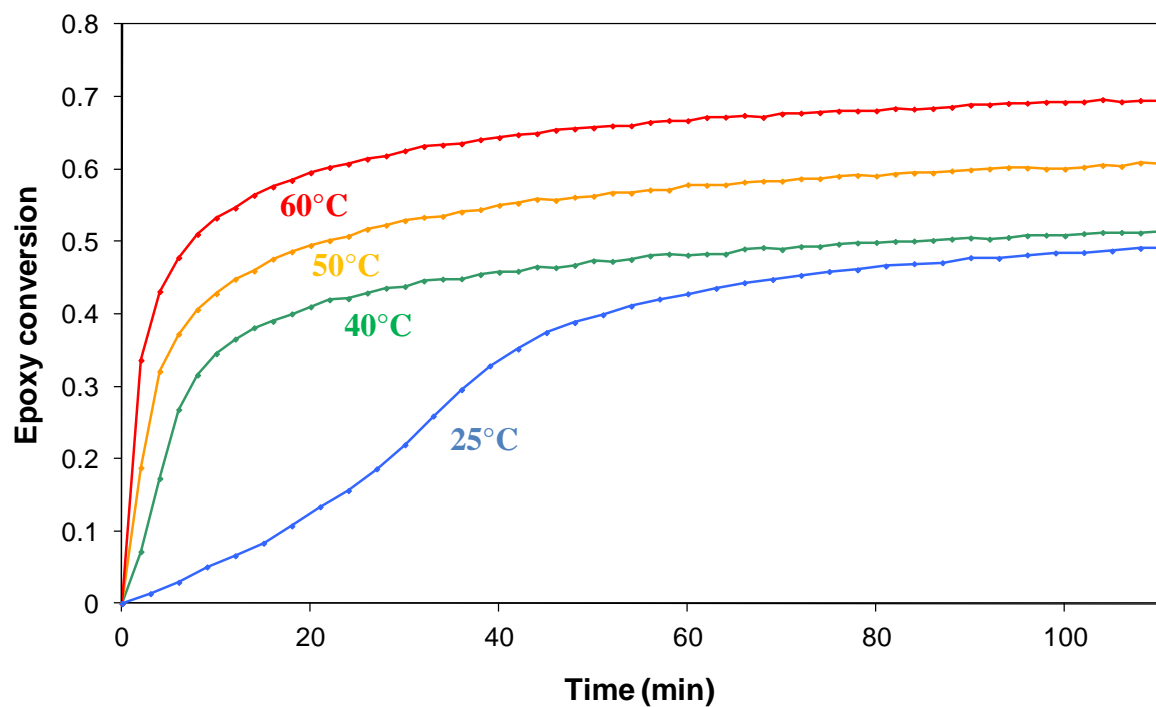

Figure S7 - Plots of epoxy conversion during the cationic polymerization of DGEBA initiated by 0.026eq./epoxy of  $\text{BF}_4^- \cdot 4\text{CA}^+$  at various temperatures.

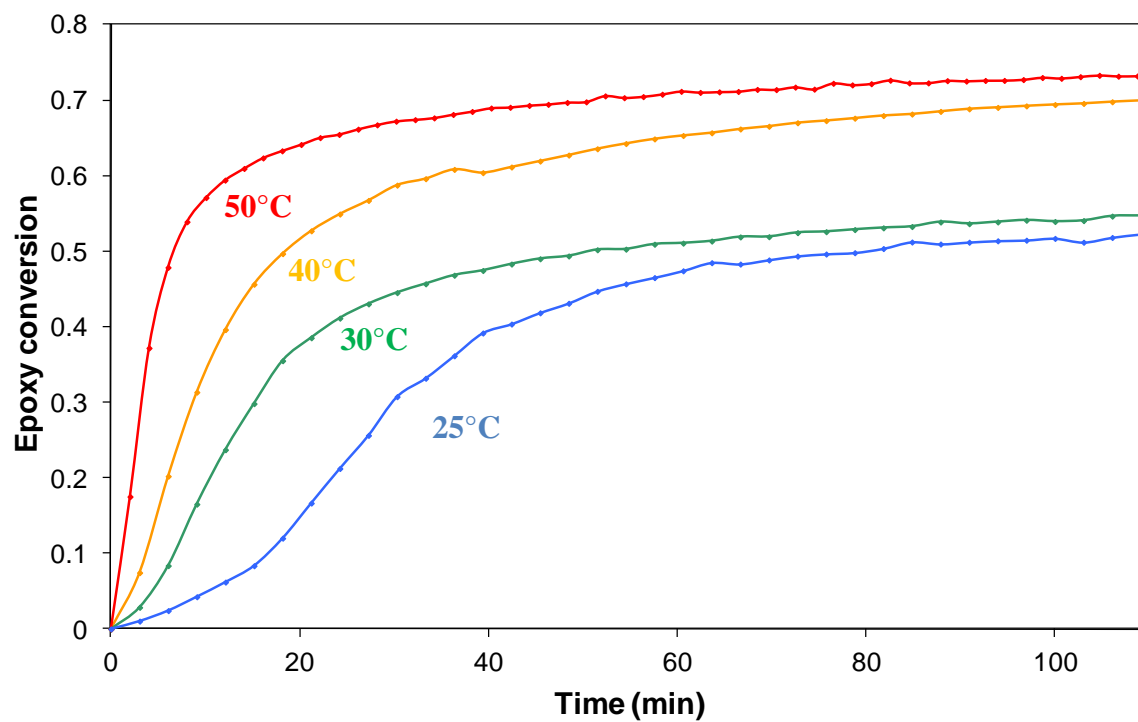

Figure S8 - Plots of epoxy conversion during the cationic polymerization of DGEBA initiated by 0.026eq./epoxy of  $\text{BF}_3 \cdot 4\text{CA}$  at various temperatures.

## VI. Rheology monitoring of the curing: procedure and $G'/G''$ data.

Rheological measurements under isothermal conditions were monitored using an Anton Paar Physica MCR 501 rheometer operating in the parallel plates geometry. The disposable plates were preheated in the rheometer environmental chamber for approximately 10min at the set temperature before loading the samples. The gap between plates was fixed at 1mm, and experiments were performed under oscillations at a frequency of 1rad/s and a shear strain of 1%. In the article, complex viscosity modulus, defined as  $|\eta^*| = |G' + iG''/\omega|$ , is reported in the different plots. Here are represented the  $G'$  and  $G''$  moduli plots as a function of reaction time for the DGEBA/  $\text{BF}_4^- \cdot 4\text{CA}^+ \cdot 18\text{-crown-6}$  mixtures.

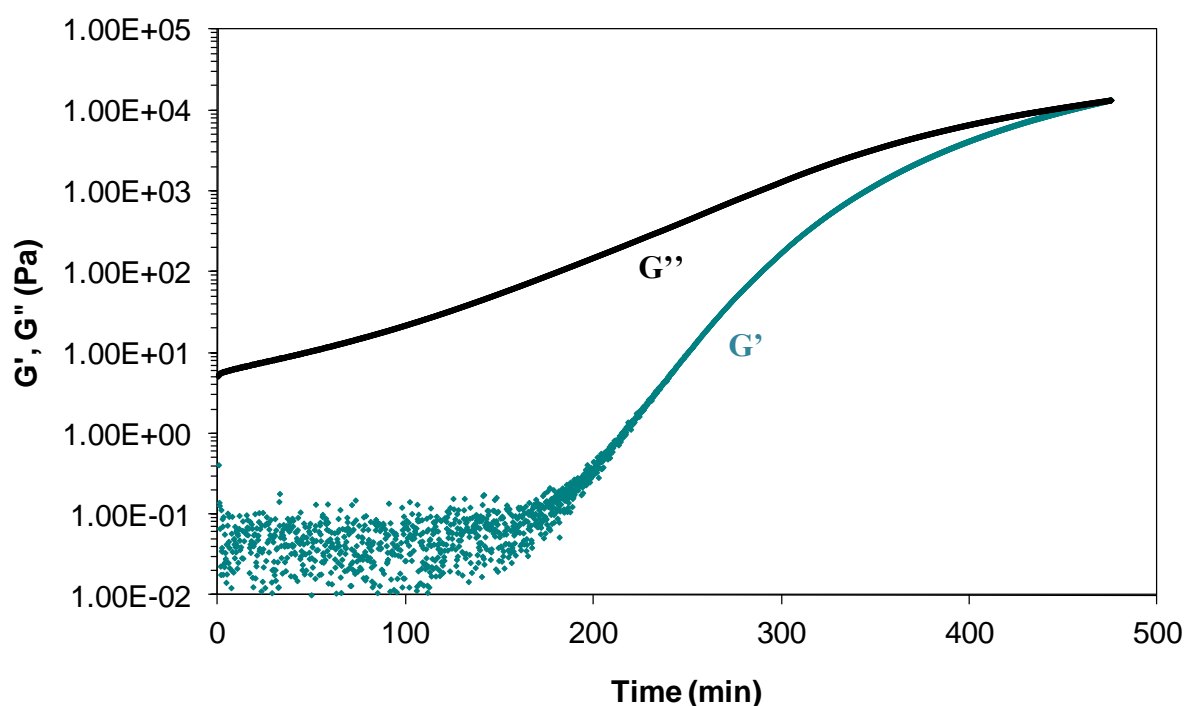

Figure S9 - Plot of  $G'$  and  $G''$  moduli as a function of reaction time for the DGEBA/  $\text{BF}_4^- \cdot 4\text{CA}^+ \cdot 18\text{-crown-6}$  0.026eq./epoxy at 25°C.

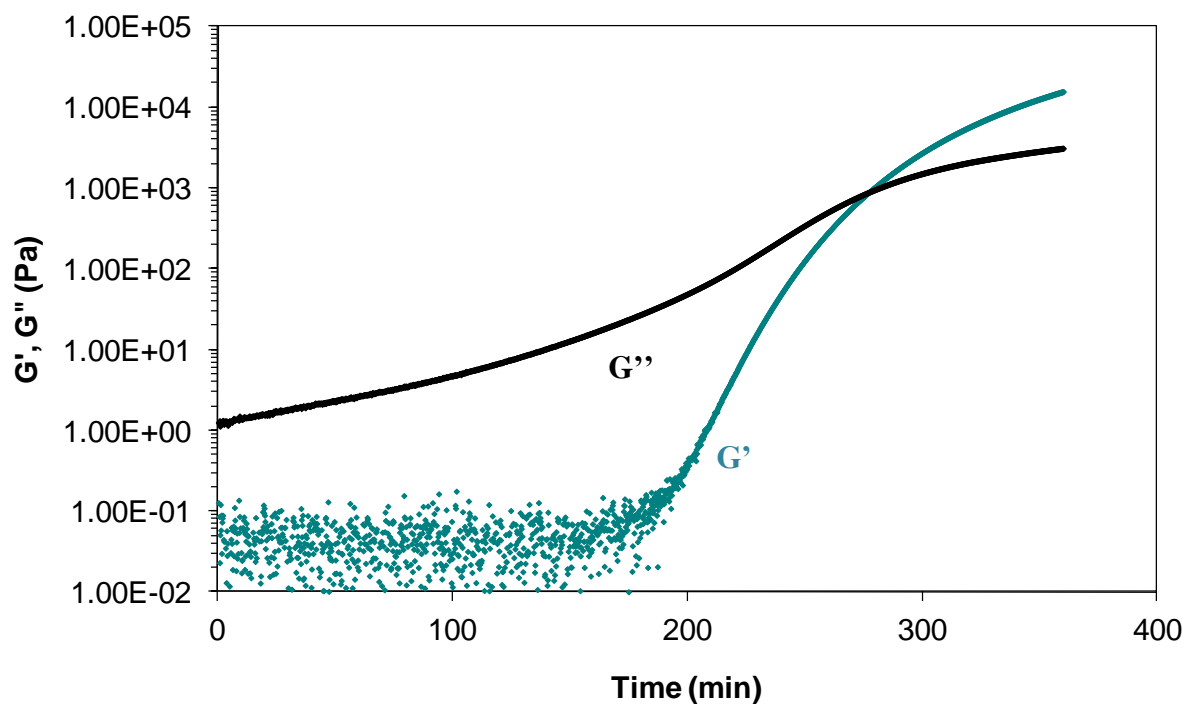

Figure S10 - Plot of  $G'$  and  $G''$  moduli as a function of reaction time for the DGEBA/  $\text{BF}_4^-$   $\text{4CA}^+$  18-crown-6 0.026eq./epoxy at 30°C.

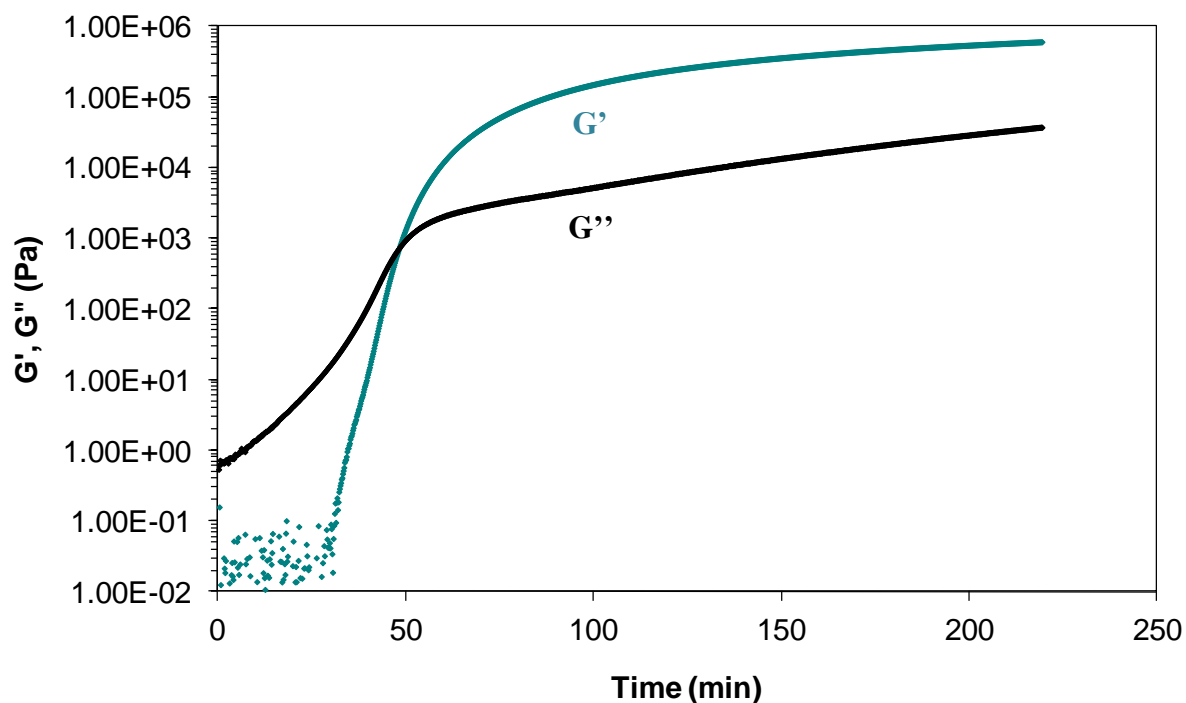

Figure S11 - Plot of  $G'$  and  $G''$  moduli as a function of reaction time for the DGEBA/  $\text{BF}_4^-$   $\text{4CA}^+$  18-crown-6 0.026eq./epoxy at 40°C.

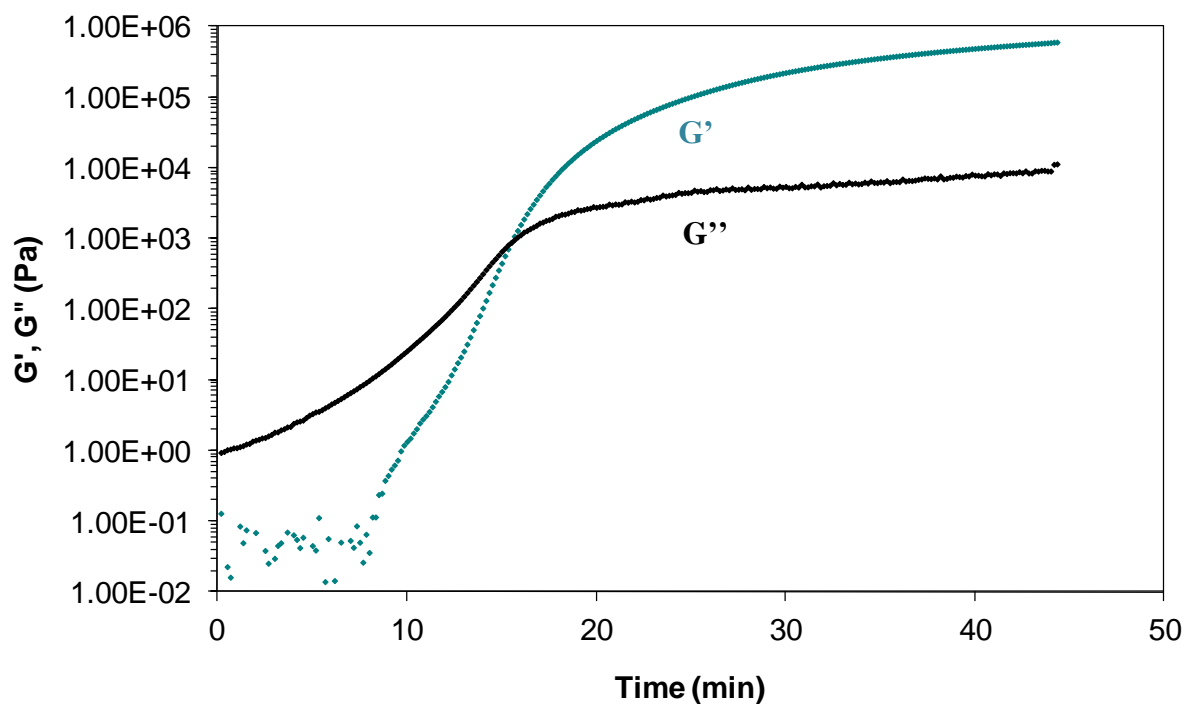

Figure S12 - Plot of  $G'$  and  $G''$  moduli as a function of reaction time for the DGEBA/  $\text{BF}_4^-$   $4\text{CA}^+$  18-crown-6 0.026eq./epoxy at 50°C.

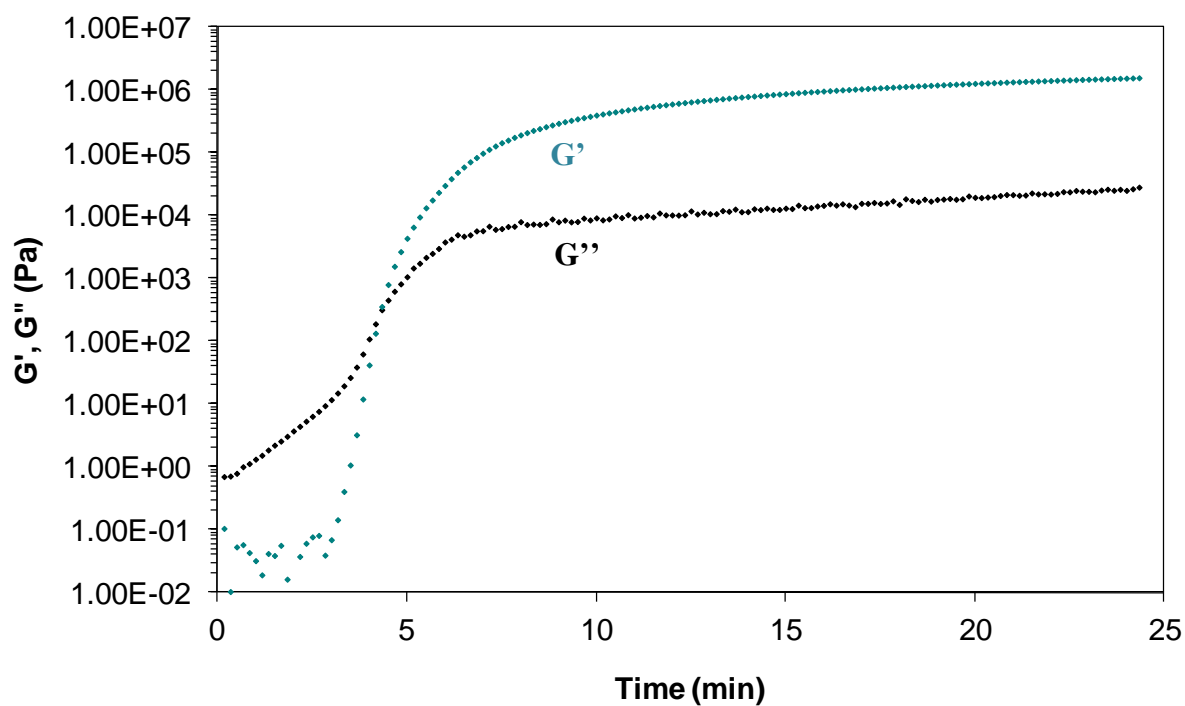

Figure S13 - Plot of  $G'$  and  $G''$  moduli as a function of reaction time for the DGEBA/  $\text{BF}_4^-$   $4\text{CA}^+$  18-crown-6 0.026eq./epoxy at 60°C.

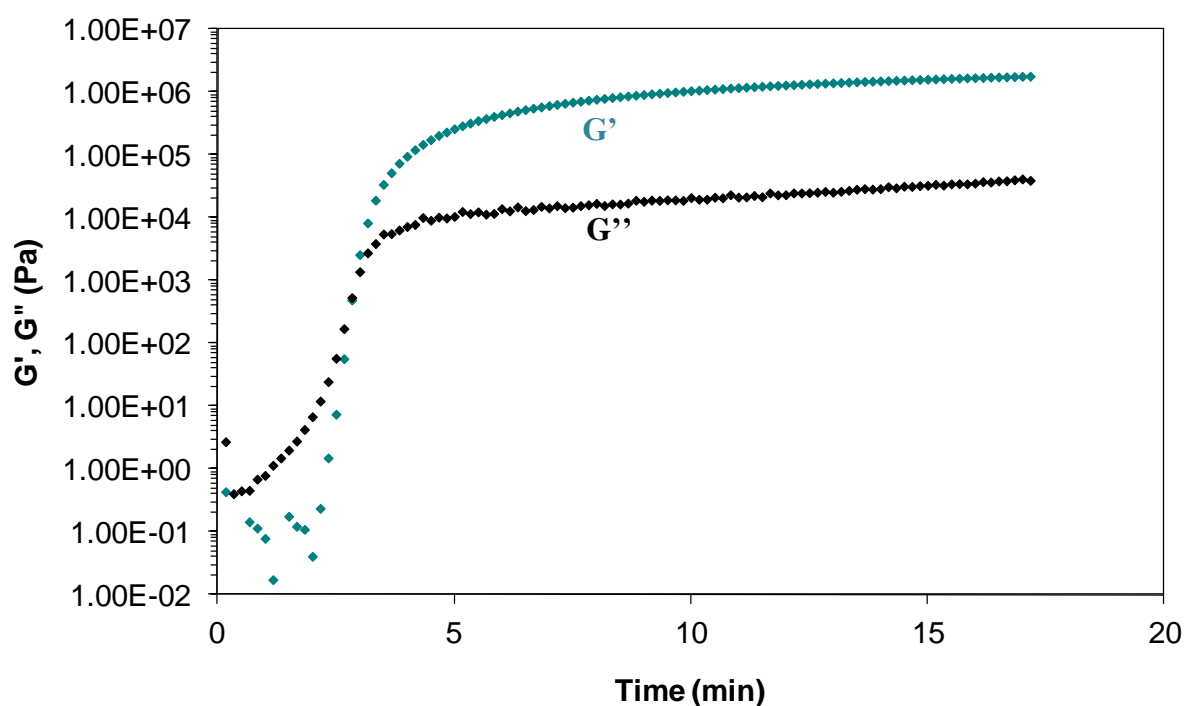

Figure S14 - Plot of  $G'$  and  $G''$  moduli as a function of reaction time for the DGEBA/  $\text{BF}_4^-$   $\cdot$   $4\text{CA}^+$   $\cdot$  18-crown-6 0.026eq./epoxy at 70°C.

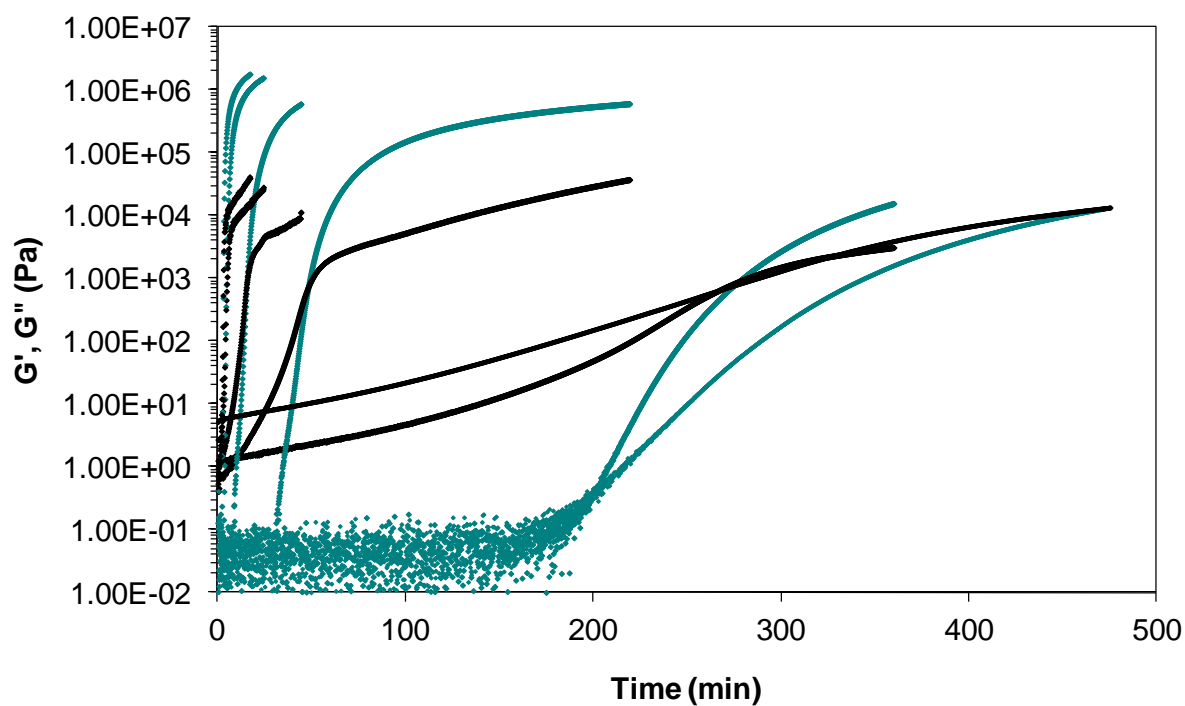

Figure S15 – Superposition of the plots of  $G'$  and  $G''$  moduli as a function of reaction time for the DGEBA/  $\text{BF}_4^-$   $\cdot$   $4\text{CA}^+$   $\cdot$  18-crown-6 0.026eq./epoxy for all the temperature previously reported.

## VII. DSC monitoring of the curing: Procedure and Thermograms.

Calorimetric measurements were carried out using a TA DSC Q1000 instrument. Samples of 5 to 10 mg (prepared following the procedure previously reported in IV.) were scanned at  $2^{\circ}\text{C}\cdot\text{min}^{-1}$  in 40  $\mu\text{L}$  aluminum pans under nitrogen atmosphere. Samples were first stabilized at  $25^{\circ}\text{C}$  and then heated to  $180^{\circ}\text{C}$  while monitoring the heat flow.

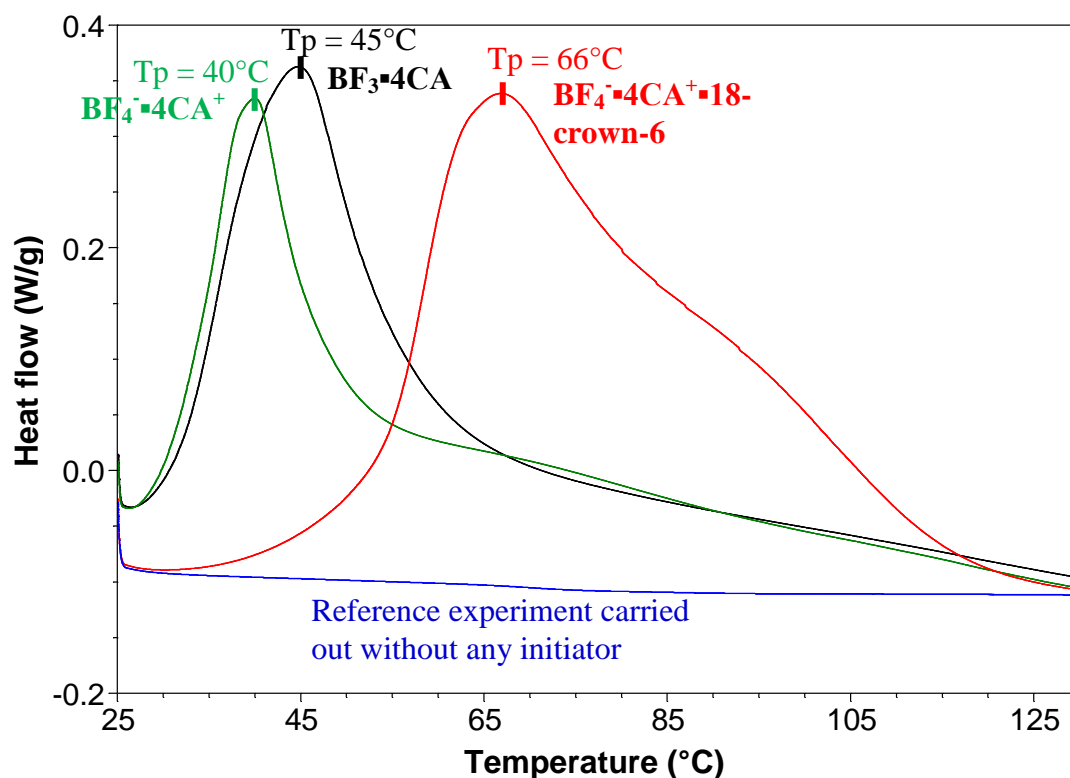

Figure S16 – DSC thermograms of the polymerization of the systems DGEBA/  $\text{BF}_4^{-}\cdot 4\text{CA}^{+}$  0.026eq./epoxy, DGEBA/  $\text{BF}_3\cdot 4\text{CA}$  0.026eq./epoxy and DGEBA/  $\text{BF}_4^{-}\cdot 4\text{CA}^{+}\cdot 18\text{-crown-6}$  0.026eq./epoxy carried out between  $25^{\circ}\text{C}$  and  $180^{\circ}\text{C}$  at  $2^{\circ}\text{C}/\text{min}$ . (Exotherm up)

The same experiments were carried out at different heating rates (5, 10 and  $20^{\circ}\text{C}/\text{min}$ ) for mixtures of DGEBA with  $\text{BF}_4^{-}\cdot 4\text{CA}^{+}\cdot 18\text{-crown-6}$  (0.026eq./epoxy). Prime<sup>v</sup> has suggested that the apparent cure activation energy ( $E_a$ ) may be estimated with a very good accuracy through the dependence of the peak exotherm temperature  $T_p$  on heating rate according to the following equation:

$$E_a = - \frac{R}{1,052} \frac{\Delta \ln \Phi}{\Delta (1/T_p)}$$

where  $\Phi$  is the heating rate and  $R$  the gas constant.



| $\Phi$ (°C/min) | $\ln \Phi$ | $T_p$ (°C) | $1000/T_p$ (K <sup>-1</sup> ) |
|-----------------|------------|------------|-------------------------------|
| 2               | 0.69       | 66         | 2.95                          |
| 5               | 1.61       | 73         | 2.89                          |
| 10              | 2.30       | 79         | 2.84                          |
| 20              | 2.99       | 88         | 2.77                          |

Table S1 – Heating rates  $\Phi$  of the different curing experiment for the system **BF<sub>4</sub><sup>-</sup>•4CA<sup>+</sup>•18-crown-6** (0.026eq./epoxy) and the corresponding peak exotherm temperatures  $T_p$

For each heating rate the value of the peak exotherm temperature is reported in the Table S1. The plot of  $\ln \Phi$  as a function of  $1/T_p$ , given in figure S17, presents a good linear relationship (correlation coefficient of 0.99) from which the apparent activation energy  $E_a$  is calculated using the previous equation. A value of **101KJ/mol** was found which is in very good agreement with the value estimated from gel times **100KJ/mol** and presented in the article.

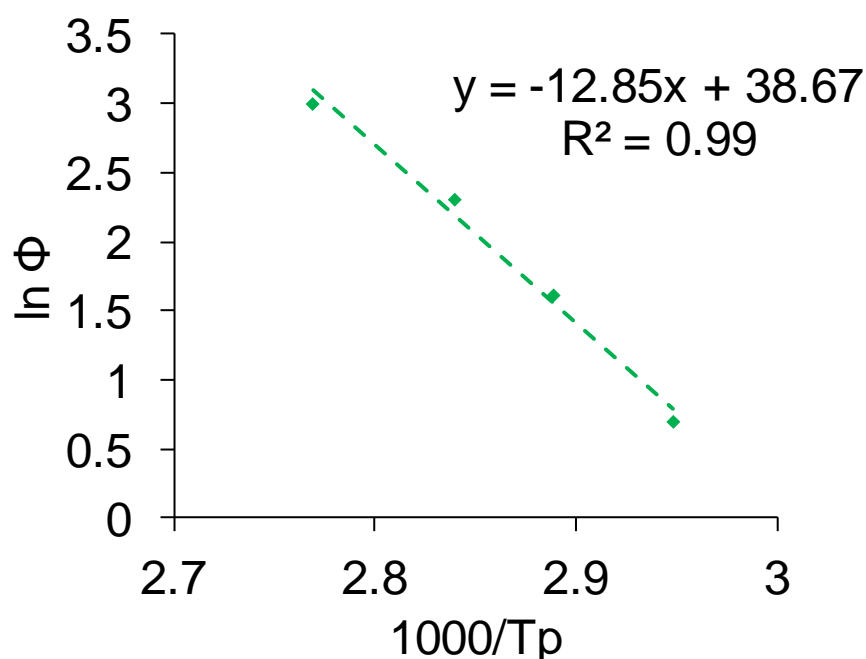

Figure S17 – Plot of  $\ln \Phi$  as a function of  $1000/T_p$  obtained from the different DSC thermograms during the curing experiments of the system **DGEBA/BF<sub>4</sub><sup>-</sup>•4CA<sup>+</sup>•18-crown-6** (0.026eq./epoxy)

### VIII. DSC of materials : glass temperature Tg.

Mixtures, prepared following the procedure previously reported (IV), were cured in a press at 70°C during 10 hours followed by a post curing at 140°C during 4 hours. DSC of the materials were performed using a TA DSC Q1000 instrument. Samples of 5 to 10 mg were scanned at 10°C.min<sup>-1</sup> in 40μL aluminum pans under nitrogen atmosphere. They were first heated to 200°C to stabilize their geometry and optimize heat transfer and cooled to -20°C. They were then heated a second time to 200°C and Tg was obtained from the inflection point of the curves of the third scan.

| Initiator                                                    | Tg of materials (°C) |
|--------------------------------------------------------------|----------------------|
| <b>BF<sub>3</sub>•4CA</b>                                    | 125                  |
| <b>BF<sub>4</sub><sup>-</sup>•4CA<sup>+</sup></b>            | 142                  |
| <b>BF<sub>4</sub><sup>-</sup>•4CA<sup>+</sup>•18-crown-6</b> | 121                  |

Table S2 – Tg of materials DGEBA/ **BF<sub>4</sub><sup>-</sup>•4CA<sup>+</sup>** 0.026eq./epoxy, DGEBA/ **BF<sub>3</sub>•4CA** 0.026eq./epoxy and DGEBA/ **BF<sub>4</sub><sup>-</sup>•4CA<sup>+</sup>•18-crown-6** 0.026eq./epoxy obtained from DSC thermograms carried out at 10°C/min.

## IX. References.

---

- <sup>i</sup> J. J. Harris, S. C. Temin, **Proposed Mechanism for the Curing of Epoxy Resins with Amine-Lewis Acid Complexes or Salts**, *J. App. Polym. Sci.*, *Vol. 10*, 523-531, **1966**
- <sup>ii</sup> M. Arasa, X. Ramis, J.M. Salla, A. Matacon, A. Serra, **Kinetic study by FTIR and DSC on the cationic curing of a DGEBA/ $\gamma$ -valerolactone mixture with ytterbium triflate as an initiator**, *Thermochimica Acta*, *479*, 37-44, **2008**.
- <sup>iii</sup> N. Poisson, G. Lachenal, H. Sautereau, **Near- and mid-infrared spectroscopy studies of an epoxy reactive system**, *Vibrational spectroscopy*, *12*, 237-247, **1996**
- <sup>iv</sup> P. Musto, E. Martuscelli, G. Ragosta, P. Russo, P. Villano, **Tetrafunctional Epoxy Resins : Modeling the Curing Kinetics Based on FTIR Spectroscopy Data**, *J. App. Polym. Sci.*, *Vol. 74*, 532-540, **1999**
- <sup>v</sup> B. Prime, in **Thermal Characterization of Polymeric Materials**, Ch. 5, E. A. Turi, ed., Academic Press, New York, **1981**
